# Supplementary material for: Controlling the Substrate Specificity of an Enzyme through Structural Flexibility by Varying the Salt-Bridge Density
Source: MDPI journal article supplement (doi:10.3390/molecules26185693), 2021-09-20
Supplement: s1 [file s1]

# Supplementary Materials

## Controlling the Substrate Specificity of an Enzyme through Structural Flexibility by Varying the Salt-Bridge Density

Juan Huang<sup>1,2,†</sup>, Qin Xu<sup>1,†,\*</sup>, Zhuo Liu<sup>2,3,4</sup>, Nitin Jain<sup>5</sup>, Madhusudan Tyagi<sup>6,7</sup>, Dong-Qing Wei<sup>1,8,\*</sup>, Liang Hong<sup>2,3,\*</sup>

<sup>1</sup> State Key Laboratory of Microbial Metabolism, School of Life Sciences and Biotechnology, Shanghai Jiao Tong University, Shanghai 200240, China; juanhuang2015@sjtu.edu.cn

<sup>2</sup> Institute of Natural Sciences, Shanghai Jiao Tong University, Shanghai 200240, China

<sup>3</sup> School of Physics and Astronomy, Shanghai Jiao Tong University, Shanghai 200240, China; liuzhuo-chirality@hotmail.com

<sup>4</sup> Institute for Advanced Study, The Hong Kong University of Science and Technology, Hong Kong, China

<sup>5</sup> Department of Biochemistry and Cellular and Molecular Biology, University of Tennessee, Knoxville, TN 37996, USA; njain@utk.edu

<sup>6</sup> NIST Center for Neutron Research, National Institute of Standards and Technology (NIST), Gaithersburg, MD 20899, USA; madhusudan.tyagi@nist.gov

<sup>7</sup> Department of Materials Science and Engineering, University of Maryland, College Park, MD 20742, USA

<sup>8</sup> Peng Cheng Laboratory, Shenzhen 518055, China

\* Correspondence: hongli3liang@sjtu.edu.cn (L.H.); dqwei@sjtu.edu.cn (D.-Q.W.); xuqin523@sjtu.edu.cn (Q.X.); Tel.: +86-213-420-4185 (Q.X.); +86-213-420-4573 (D.-Q.W.); +86-215-474-2996 (L.H.)

† These authors contributed equally to this work.

### TABLE OF CONTENTS

|               |     |
|---------------|-----|
| 1. Figure S1. | S2  |
| 2. Figure S2. | S3  |
| 3. Figure S3. | S4  |
| 4. Figure S4  | S5  |
| 5. Figure S5  | S6  |
| 6. Table S1.  | S7  |
| 7. Table S2.  | S8  |
| 8. Table S3.  | S12 |
| 9. References | S13 |

| Protein   | CYP101 |      |      |      |      |      |      |      | CYP2C9 |      |      |      |      |      |      |      |
|-----------|--------|------|------|------|------|------|------|------|--------|------|------|------|------|------|------|------|
| PDB_ID    | 5GXG   | 2ZAX | 1DZ9 | 5CP4 | 1PHC | 2H7R | 1P2Y | 3L61 | 1R9O   | 5X23 | 5XXI | 5W0C | 5K7K | 5A5J | 5X24 | 5A5I |
| Substrate | DTT    | CAM  | CAM  | CAM  | 0    | 1MZ  | NCT  | 0    | FLP    | LSN  | LSN  | 9W6  | 6RJ  | 6YF  | LSN  | XI1  |

  

DTT

NCT

CAM

1MZ

9W6

6RJ

XI1

6YF

FLP

LSN

**Figure S1.** Detailed ligand information on selected crystal structures of CYP101 and CYP2C9 in Figure 2C, “0” represents a ligand-free structure.

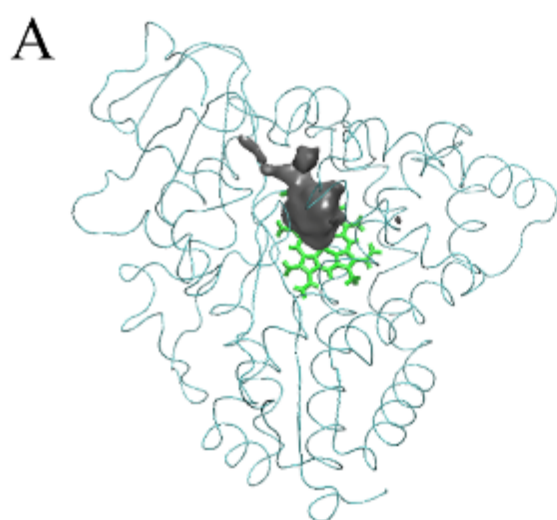

**CYP101**

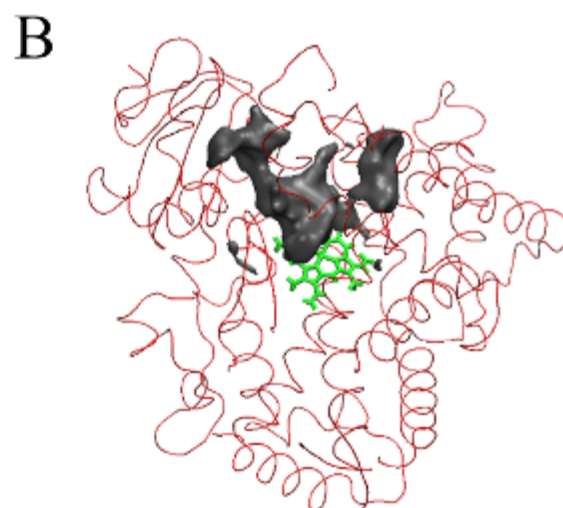

**CYP2C9**

**Figure S2.** An example to compare the catalytic pockets between (A) CYP101 (PDB: 1DZ9) and (B) CYP2C9 (PDB: 5XXI). The pocket is calculated by the software POVME 2.0 [1, 2] and visualized by VMD [3].

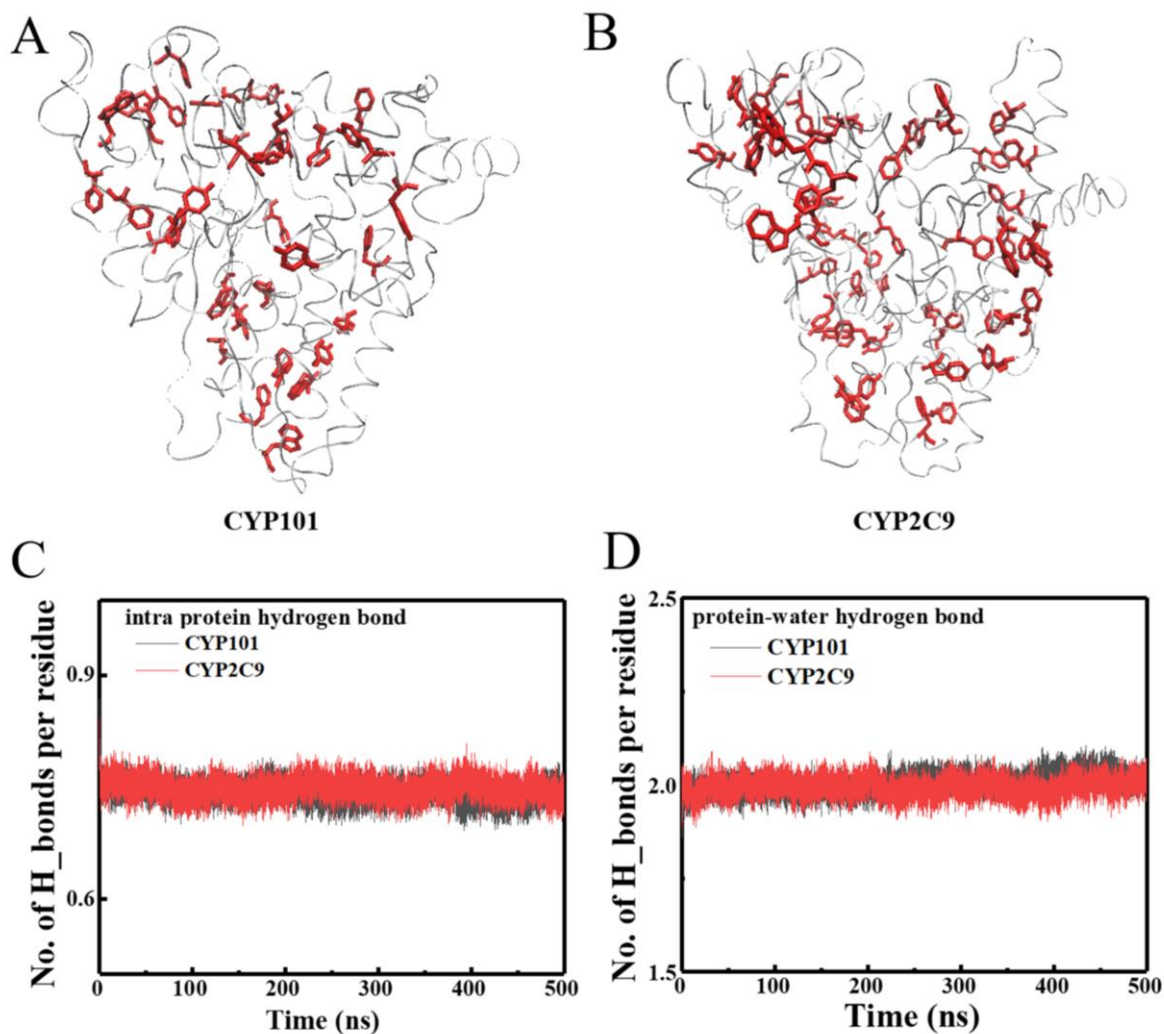

**Figure S3.** Comparison of other structural factors which might contribute to the difference in flexibility between CYP101 and CYP2C9. Distribution of aromatic residues (marked red) in (A) CYP101 (PDB: 1DZ9) and (B) CYP2C9 (PDB: 5XXI) in the two proteins (7.73% of CYP101 vs 9.59% of CYP2C9, and more details can be seen in Table S1). The hydrophobic interactions between nearby aromatic residues, or namely aromatic clusters, are often considered to play an important role in stabilizing and rigidifying the protein structure [4-6]. As seen in Figure S3A-B and Table S1, CYP2C9 has similar or slightly more aromatic residues as compared to CYP101. If the aromatic interaction plays a dominant role, CYP2C9 should have similar or even lower flexibility, contradicting our experimental and simulation observations (Figures 2 and 3 in the main text). The number of (C) intra-protein hydrogen bonds and (D) protein-water hydrogen bonds per protein residue for CYP101 (black) and CYP2C9 (red) are also quite similar for the two enzymes. Hence, all these interactions cannot be the dominant cause for the different structural flexibilities between the two CYP450s.

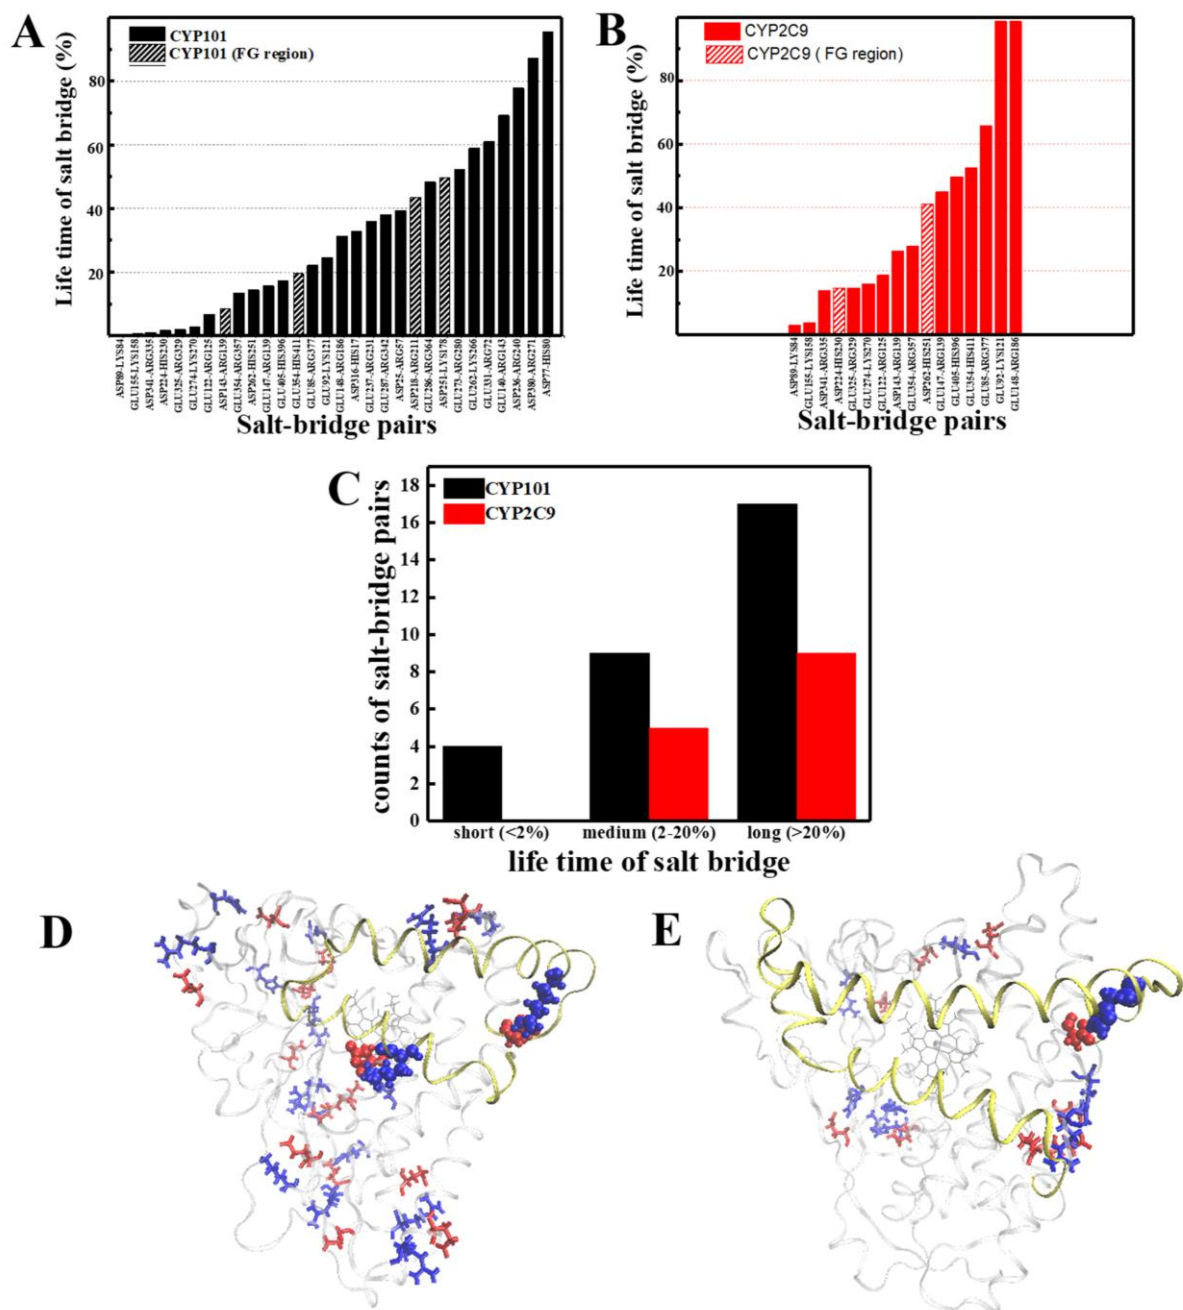

**Figure S4.** The life time of salt-bridge pairs in (A) CYP101 and (B) CYP2C9 obtained in 500 ns MD simulations. Those pairs at the F-G region are highlighted with slash. (C) The life time of salt-bridge pairs distribution in CYP101 and CYP2C9. The salt-bridge pairs at the F-G region and with life time higher than 20% (100 ns) are marked as bonds in the crystal protein structures of (D) CYP101 (PDB: 1DZ9) and (E) CYP2C9 (PDB: 5XXI), where the salt-bridge pairs in the F-G region are highlighted as spheres. The negatively and positively charged residues are colored in red and blue, respectively.

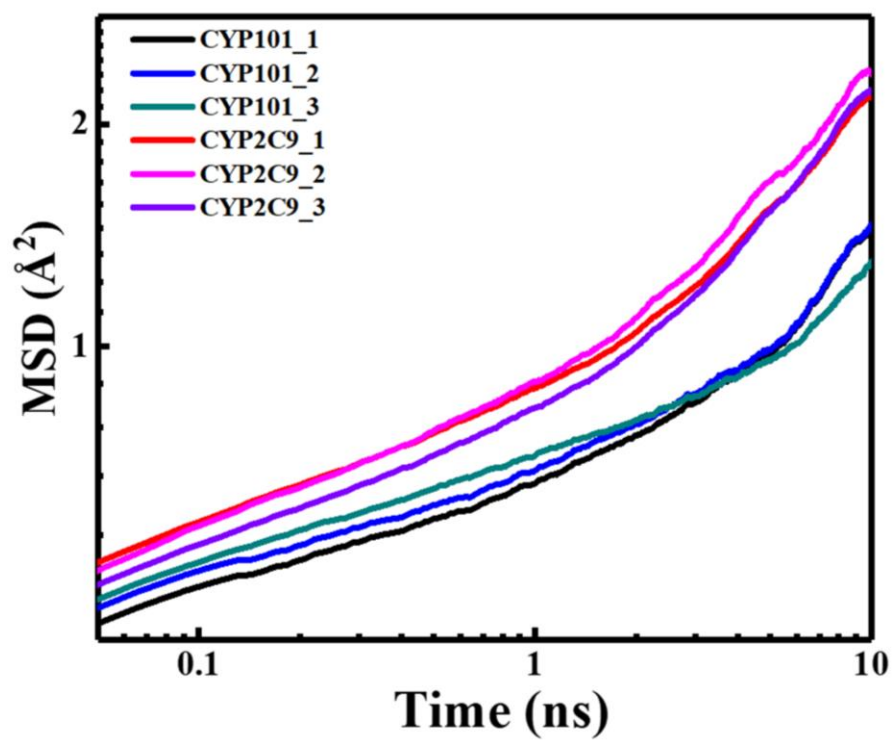

**Figure S5.** MD-derived mean-squared atomic displacement (MSD) (10 ps to 10 ns) in CYP101 and CYP2C9 obtained by analyzing three independent 500 ns simulations for each protein.

**Table S1.** Aromatic residues in CYP101 (PDB: 1DZ9) and CYP2C9 (PDB: 5XXI).

| Protein                 | CYP101 | CYP2C9 |
|-------------------------|--------|--------|
| Trp                     | 5      | 2      |
| Tyr                     | 9      | 12     |
| Phe                     | 18     | 33     |
| Total aromatic residues | 32     | 47     |
| Total residues          | 414    | 490    |
| Ratio                   | 7.73%  | 9.59%  |

**Table S2.** List of 146 different kinds of CYP450s, whose experimentally determined structures were downloaded from the protein data bank and used for further MD simulations. The obtained MD results are presented in Figure 5.

| Biological Categories | Organism(s)                         | CYP450s  | PDB ID |
|-----------------------|-------------------------------------|----------|--------|
| Animalia              | <i>bos taurus</i>                   | CYP11A1  | 3mzs   |
| Animalia              | <i>bos taurus</i>                   | CYP21A2  | 3qz1   |
| Animalia              | <i>danio rerio</i>                  | CYP17A1  | 4r1z   |
| Animalia              | <i>danio rerio</i>                  | CYP17A2  | 4r20   |
| Animalia              | <i>danio rerio</i>                  | CYP8A1   | 3b98   |
| Animalia              | <i>homo sapiens</i>                 | CYP11A1  | 3n9z   |
| Animalia              | <i>homo sapiens</i>                 | CYP11B1  | 6m7x   |
| Animalia              | <i>homo sapiens</i>                 | CYP11B2  | 4fdh   |
| Animalia              | <i>homo sapiens</i>                 | CYP17A1  | 5irv   |
| Animalia              | <i>homo sapiens</i>                 | CYP19A1  | 5jl7   |
| Animalia              | <i>homo sapiens</i>                 | CYP1A1   | 6dwn   |
| Animalia              | <i>homo sapiens</i>                 | CYP1A2   | 2hi4   |
| Animalia              | <i>homo sapiens</i>                 | CYP1B1   | 3pm0   |
| Animalia              | <i>homo sapiens</i>                 | CYP21A2  | 5vbu   |
| Animalia              | <i>homo sapiens</i>                 | CYP2A13  | 3t3s   |
| Animalia              | <i>homo sapiens</i>                 | CYP2A6   | 4rui   |
| Animalia              | <i>homo sapiens</i>                 | CYP2B6   | 4zv8   |
| Animalia              | <i>homo sapiens</i>                 | CYP2C19  | 4gqs   |
| Animalia              | <i>homo sapiens</i>                 | CYP2C8   | 2nni   |
| Animalia              | <i>homo sapiens</i>                 | CYP2C9   | 1og2   |
| Animalia              | <i>homo sapiens</i>                 | CYP2D6   | 4wnw   |
| Animalia              | <i>homo sapiens</i>                 | CYP2E1   | 3koh   |
| Animalia              | <i>homo sapiens</i>                 | CYP2R1   | 3czh   |
| Animalia              | <i>homo sapiens</i>                 | CYP3A4   | 4ny4   |
| Animalia              | <i>homo sapiens</i>                 | CYP3A5   | 6mjm   |
| Animalia              | <i>homo sapiens</i>                 | CYP46A1  | 2q9g   |
| Animalia              | <i>homo sapiens</i>                 | CYP51    | 3ld6   |
| Animalia              | <i>homo sapiens</i>                 | CYP7A1   | 3v8d   |
| Animalia              | <i>homo sapiens</i>                 | CYP8A1   | 2iag   |
| Animalia              | <i>neotoma lepida</i>               | CYP2B37  | 5e0e   |
| Animalia              | <i>oryctolagus cuniculus</i>        | CYP2B4   | 3tk3   |
| Animalia              | <i>oryctolagus cuniculus</i>        | CYP2C5   | 1dt6   |
| Animalia              | <i>oryctolagus cuniculus</i>        | CYP4B1   | 6c94   |
| Animalia              | <i>rattus norvegicus</i>            | CYP24A1  | 3k9v   |
| Archaea               | <i>sulfurisphaera tokodaii</i>      | CYP119   | 3b4x   |
| Archaea               | <i>picrophilus torridus</i>         | CYP231A2 | 2rfb   |
| Archaea               | <i>sulfolobus acidocaldarius</i>    | CYP119   | 1io8   |
| Bacteria              | <i>actinoplanes teichomyceticus</i> | CYP165D3 | 3o1a   |
| Bacteria              | <i>actinoplanes teichomyceticus</i> | CYPOxyA  | 5hh3   |
| Bacteria              | <i>actinoplanes teichomyceticus</i> | CYPOxyB  | 4tvf   |
| Bacteria              | <i>amycolatopsis balhimycina</i>    | CYPOxyD  | 3mgx   |
| Bacteria              | <i>amycolatopsis mediterranei</i>   | CYPRif16 | 5ysm   |
| Bacteria              | <i>amycolatopsis methanolica</i>    | CYPGcoA  | 5omr   |



|          |                                        |            |      |
|----------|----------------------------------------|------------|------|
| Bacteria | <i>amycolatopsis orientalis</i>        | CYP105AS1  | 4oqs |
| Bacteria | <i>amycolatopsis orientalis</i>        | CYPOxyB    | 1lgf |
| Bacteria | <i>amycolatopsis orientalis</i>        | CYPOxyC    | 1ued |
| Bacteria | <i>arthrobacter sp</i>                 | CYP1232A24 | 6g71 |
| Bacteria | <i>bacillus megaterium</i>             | CYP106A2   | 5xnt |
| Bacteria | <i>bacillus megaterium</i>             | CYP109A2   | 5ofq |
| Bacteria | <i>bacillus megaterium</i>             | CYP109E1   | 5190 |
| Bacteria | <i>bacillus megaterium</i>             | CYPBM3     | 3kx4 |
| Bacteria | <i>bacillus methanolicus</i>           | CYP152K6   | 6fyj |
| Bacteria | <i>bacillus subtilis</i>               | CYP109B1   | 4rm4 |
| Bacteria | <i>bacillus subtilis</i>               | CYP134A1   | 3nc5 |
| Bacteria | <i>bacillus subtilis</i>               | CYP152A1   | 2zqj |
| Bacteria | <i>bacillus subtilis</i>               | CYPBiol    | 3ejb |
| Bacteria | <i>bacillus subtilis</i>               | CYPPksS    | 4yzr |
| Bacteria | <i>chondromyces apiculatus</i>         | CYP109Q5   | 6gmf |
| Bacteria | <i>citrobacter braakii</i>             | CYPcin     | 1t2b |
| Bacteria | <i>corynebacterium glutamicum</i>      | CYPCREJ    | 5gwe |
| Bacteria | <i>exiguobacterium sp</i>              | CYP152N1   | 5yhj |
| Bacteria | <i>jeotgalicoccus sp. 8456</i>         | CYP152L1   | 4l54 |
| Bacteria | <i>micromonospora griseorubida</i>     | CYPMycCI   | 5foi |
| Bacteria | <i>micromonospora griseorubida</i>     | CYPMycG    | 2y5n |
| Bacteria | <i>mycobacterium marinum</i>           | CYP124A1   | 6cvc |
| Bacteria | <i>mycobacterium marinum</i>           | CYP150A6   | 6dcd |
| Bacteria | <i>mycobacterium marinum</i>           | CYP268A2   | 6bld |
| Bacteria | <i>mycobacterium smegmatis</i>         | CYP125A3   | 5dqn |
| Bacteria | <i>mycobacterium smegmatis</i>         | CYP142A    | 4uax |
| Bacteria | <i>mycobacterium smegmatis</i>         | CYP164A2   | 3r9c |
| Bacteria | <i>mycobacterium tuberculosis</i>      | CYP121     | 3g5f |
| Bacteria | <i>mycobacterium tuberculosis</i>      | CYP124     | 2wm5 |
| Bacteria | <i>mycobacterium tuberculosis</i>      | CYP125     | 2x5l |
| Bacteria | <i>mycobacterium tuberculosis</i>      | CYP126A1   | 5li7 |
| Bacteria | <i>mycobacterium tuberculosis</i>      | CYP130     | 2uuq |
| Bacteria | <i>mycobacterium tuberculosis</i>      | CYP142     | 2xkr |
| Bacteria | <i>mycobacterium tuberculosis</i>      | CYP144A1   | 5hdi |
| Bacteria | <i>mycobacterium tuberculosis</i>      | CYP51      | 2bz9 |
| Bacteria | <i>nocardia farcinica</i>              | CYP154C5   | 4j6c |
| Bacteria | <i>nonomuraea recticatena</i>          | CYP105     | 2z36 |
| Bacteria | <i>novosphingobium aromaticivorans</i> | CYP101D1   | 4c9m |
| Bacteria | <i>novosphingobium aromaticivorans</i> | CYP101D2   | 3nv5 |
| Bacteria | <i>novosphingobium aromaticivorans</i> | CYP108D1   | 3tkf |
| Bacteria | <i>pseudomonas putida</i>              | CYP101A1   | 1dz9 |
| Bacteria | <i>pseudonocardia autotrophica</i>     | CYPvdh     | 5gnm |
| Bacteria | <i>rhodococcus erythropolis</i>        | CYP1050A1  | 3wec |
| Bacteria | <i>rhodococcus rhodochrous</i>         | CYPXplA    | 2wiv |
| Bacteria | <i>rhodopseudomonas palustris</i>      | CYP199A2   | 2fr7 |
| Bacteria | <i>novosphingobium aromaticivorans</i> | CYP101D2   | 3nv5 |
| Bacteria | <i>saccharopolyspora erythraea</i>     | CYPEryF    | 1z8p |

|          |                                    |           |      |
|----------|------------------------------------|-----------|------|
| Bacteria | <i>saccharopolyspora erythraea</i> | CYPEryK   | 2wio |
| Bacteria | <i>sorangium cellulosum</i>        | CYP260A1  | 6f8a |
| Bacteria | <i>sorangium cellulosum</i>        | CYP260B1  | 5hiw |
| Bacteria | <i>sorangium cellulosum</i>        | CYP267B1  | 6gk5 |
| Bacteria | <i>sorangium cellulosum</i>        | CYPepok   | 1q5e |
| Bacteria | <i>sphingobium yanoikuyae</i>      | CYP101J2  | 5kyo |
| Bacteria | <i>sphingomonas paucimobilis</i>   | CYP152B1  | 3voo |
| Bacteria | <i>sphingomonas sp</i>             | CYP153D17 | 5h1z |
| Bacteria | <i>sphingopyxis macrogoltabida</i> | CYPoyr    | 3rwl |
| Bacteria | <i>streptomyces acidiscabies</i>   | CYPTxtC   | 6f0c |
| Bacteria | <i>streptomyces antibioticus</i>   | CYPOleP   | 4xe3 |
| Bacteria | <i>streptomyces arenae</i>         | CYPPntM   | 5l1o |
| Bacteria | <i>streptomyces atroolivaceus</i>  | CYPLnmA   | 4z5p |
| Bacteria | <i>streptomyces atroolivaceus</i>  | CYPLnmZ   | 4z5q |
| Bacteria | <i>streptomyces avermitilis</i>    | CYP105D6  | 3abb |
| Bacteria | <i>streptomyces avermitilis</i>    | CYP105D7  | 4ubs |
| Bacteria | <i>streptomyces avermitilis</i>    | CYP105P1  | 3e5j |
| Bacteria | <i>streptomyces avermitilis</i>    | CYP107L2  | 5cje |
| Bacteria | <i>streptomyces avermitilis</i>    | CYP107W1  | 4wpz |
| Bacteria | <i>streptomyces coelicolor</i>     | CYP105N1  | 3tyw |
| Bacteria | <i>streptomyces coelicolor</i>     | CYP154A1  | 1odo |
| Bacteria | <i>streptomyces coelicolor</i>     | CYP154C1  | 1gwi |
| Bacteria | <i>streptomyces coelicolor</i>     | CYP158A1  | 2nza |
| Bacteria | <i>streptomyces coelicolor</i>     | CYP158A2  | 5de9 |
| Bacteria | <i>streptomyces fradiae</i>        | CYPTyIHI  | 6b11 |
| Bacteria | <i>streptomyces graminofaciens</i> | CYPGfsF   | 5yli |
| Bacteria | <i>streptomyces griseolus</i>      | CYP105A1  | 3cv8 |
| Bacteria | <i>streptomyces griseoviridis</i>  | CYPSGVP   | 4mm0 |
| Bacteria | <i>streptomyces himastatinicus</i> | CYP107B1  | 4e2p |
| Bacteria | <i>streptomyces himastatinicus</i> | CYPHmtS   | 5z9i |
| Bacteria | <i>streptomyces himastatinicus</i> | CYPHmtT   | 4ggv |
| Bacteria | <i>streptomyces natalensis</i>     | CYPPimD   | 2x9p |
| Bacteria | <i>streptomyces peucetius</i>      | CYP105P2  | 5it1 |
| Bacteria | <i>streptomyces scabiei</i>        | CYPTxtE   | 4tpo |
| Bacteria | <i>streptomyces sp</i>             | CYP163B3  | 4pxh |
| Bacteria | <i>phenylobacterium zucineum</i>   | CYP153    | 6hqg |
| Bacteria | <i>Streptomyces sp</i>             | CYP245A1  | 2z3t |
| Bacteria | <i>streptomyces sp. JS01</i>       | CYP154C4  | 6a7i |
| Bacteria | <i>streptomyces thioluteus</i>     | CYPAurH   | 3p3x |
| Bacteria | <i>streptomyces toyocaensis</i>    | CYPStaF   | 5ex9 |
| Bacteria | <i>streptomyces toyocaensis</i>    | CYPStaH   | 5ex6 |
| Bacteria | <i>streptomyces venezuelae</i>     | CYPPikC   | 2vzm |
| Bacteria | <i>streptomyces violaceoruber</i>  | CYP154C4  | 6a7j |
| Bacteria | <i>tepidiphilus thermophilus</i>   | CYP116B46 | 6gii |
| Bacteria | <i>thermobispora bispora</i>       | CYPTbtJ1  | 5vws |
| Bacteria | <i>Zobellia galactanivorans</i>    | CYPZoGa   | 6g5q |
| Fungi    | <i>candida albicans</i>            | CYP51     | 5tz1 |

|          |                                  |          |      |
|----------|----------------------------------|----------|------|
| Fungi    | <i>fusarium oxysporum</i>        | CYP55A1  | 1cl6 |
| Fungi    | <i>candida glabrata</i>          | CYP51    | 5jlc |
| Fungi    | <i>neosartorya fumigata</i>      | CYP51B   | 4uym |
| Fungi    | <i>saccharomyces cerevisiae</i>  | CYP51    | 5esn |
| Plantae  | <i>parthenium argentatum</i>     | CYP74A   | 3dam |
| Plantae  | <i>salvia miltiorrhiza</i>       | CYP76AH1 | 5ylw |
| Plantae  | <i>arabidopsis thaliana</i>      | CYP74A   | 3cli |
| Protista | <i>trypanosoma cruzi</i>         | CYP51    | 5ajr |
| Protista | <i>trypanosoma brucei brucei</i> | CYP51    | 3glq |

---

**Table S3.** List of the Bacteria-like animal CYP450s in Figure 5

| Organism <sup>a</sup> | CYP450  | PDB ID | Salt bridge density | RMSF (nm) | Tissue        | Sub-cellular <sup>b</sup> | Function                            | Chromosome |
|-----------------------|---------|--------|---------------------|-----------|---------------|---------------------------|-------------------------------------|------------|
| H                     | CYP19A1 | 5jl7   | 3.8                 | 0.061     | Widely        | E                         | Estrogen biosynthesis               | 9          |
| H                     | CYP7A1  | 3v8d   | 4.1                 | 0.068     | liver         | E                         | Endogenous sterols                  | 8          |
| H                     | CYP11B2 | 4fdh   | 2.7                 | 0.065     | adrenal gland | M                         | Aldosterone-synthesizing            | 8          |
| H                     | CYP51   | 3ld6   | 4.4                 | 0.060     | testis        | E                         | Lanosterol 14- $\alpha$ demethylase | 7          |
| H                     | CYP11A1 | 3n9z   | 5.3                 | 0.061     | adrenal gland | M                         | Pregnenolone biosynthesis           | 15         |
| H                     | CYP46A1 | 3mdt   | 4.9                 | 0.063     | brain         | E                         | bile acids biosynthesis             | 14         |
| H                     | CYP8A1  | 2iag   | 4.8                 | 0.069     | ovary         | E                         | Prostacyclin synthase               | 20         |
| H                     | CYP11B1 | 6m7x   | 3.36                | 0.064     | adrenal gland | M                         | Glucocorticoid biosynthesis         | 8          |
| D                     | CYP17A1 | 4r1z   | 3.3                 | 0.071     | adrenal gland | E                         | Androgen biosynthesis               | 13         |
| R                     | CYP24A1 | 3k9v   | 4.4                 | 0.068     | kidney        | M                         | vitamin D synthesis                 | 3          |
| B                     | CYP11A1 | 3mzs   | 2.9                 | 0.060     | adrenal gland | M                         | Cholesterol side-chain cleavage     | 8          |

<sup>a</sup>B: bos Taurus, D: danio rerio, H: homo sapiens, R: rattus norvegicus;

<sup>b</sup>E: endoplasmic reticulum, M: mitochondria;

## REFERENCES

1. Durrant, J. D.; Votapka, L.; Sørensen, J.; Amaro, R. E., POVME 2.0: An Enhanced Tool for Determining Pocket Shape and Volume Characteristics. *J. Chem. Theory Comput.* 2014, 10, (11), 5047-5056.
2. Durrant, J. D.; de Oliveira, C. A. F.; McCammon, J. A., POVME: An algorithm for measuring binding-pocket volumes. *Journal of Molecular Graphics and Modelling* 2011, 29, (5), 773-776.
3. Humphrey, W.; Dalke, A.; Schulten, K., VMD: Visual molecular dynamics. *Journal of Molecular Graphics* 1996, 14, (1), 33-38.
4. Burley, S. K.; Petsko, G. A., Aromatic-aromatic interaction: a mechanism of protein structure stabilization. *Science* 1985, 229, (4708), 23.
5. Aravinda, S.; Shamala, N.; Das, C.; Sriranjini, A.; Karle, I. L.; Balaram, P., Aromatic–Aromatic Interactions in Crystal Structures of Helical Peptide Scaffolds Containing Projecting Phenylalanine Residues. *J. Am. Chem. Soc.* 2003, 125, (18), 5308-5315.
6. Liu, Z.; Lemmonds, S.; Huang, J.; Tyagi, M.; Hong, L.; Jain, N.; Entropic contribution to enhanced thermal stability in the thermostable P450 CYP119, *Proc. Natl. Acad. Sci. U.S.A.* 2018, 115 (43), E10049-E10058.
7. Karshikoff, A.; Jelezarov, I., Salt Bridges and Conformational Flexibility: Effect on Protein Stability. *Biotechnol. Biotechnol. Equip.* 2008, 22, (1), 606-611.
